# Supplementary material
Source: publisher figshare collection journal article supplement (https://tandf.figshare.com/ndownloader/files/13687157)
Supplement: Supplementary file 1 [file 13687157]

**Supplementary figure 1:** **Gene significance vs intramodular connectivity of three candidate modules**

**1a**


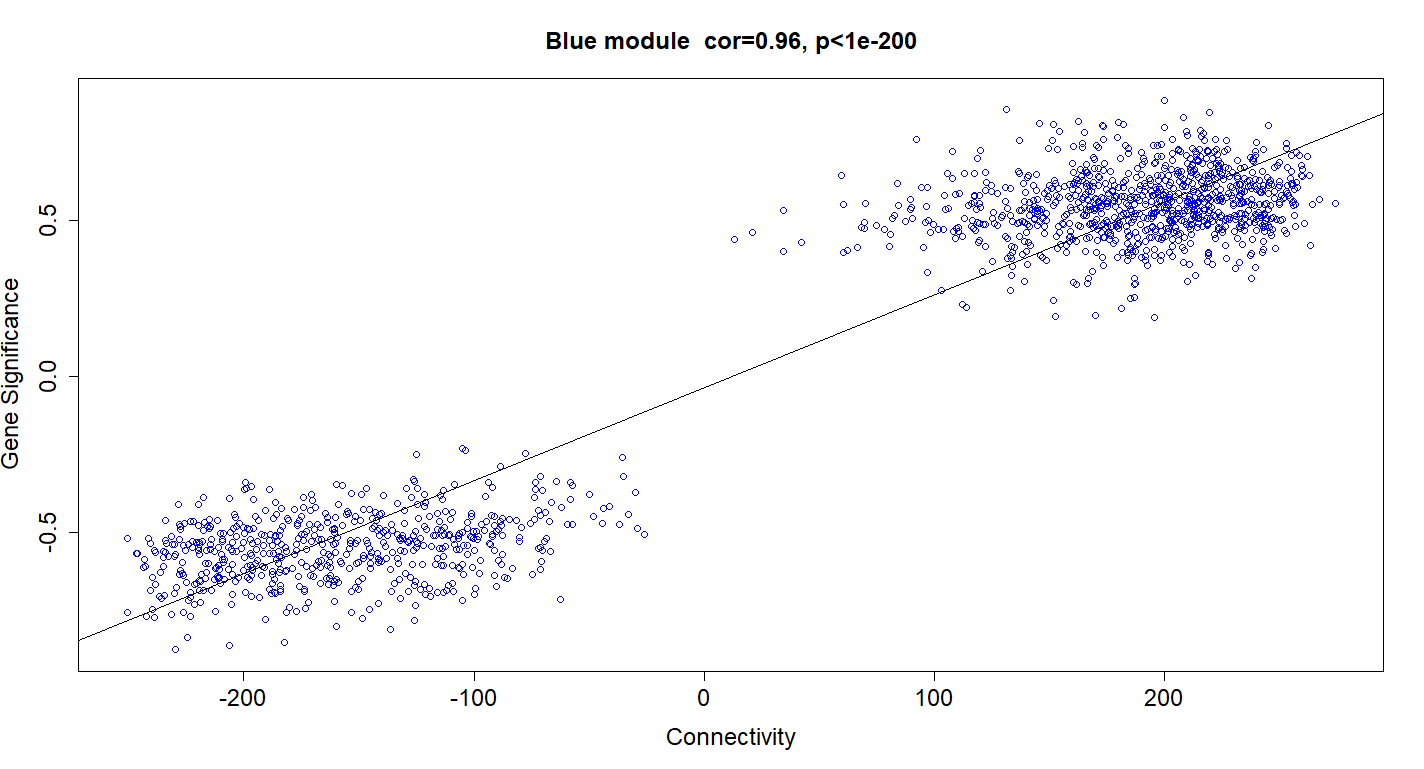


**1b**


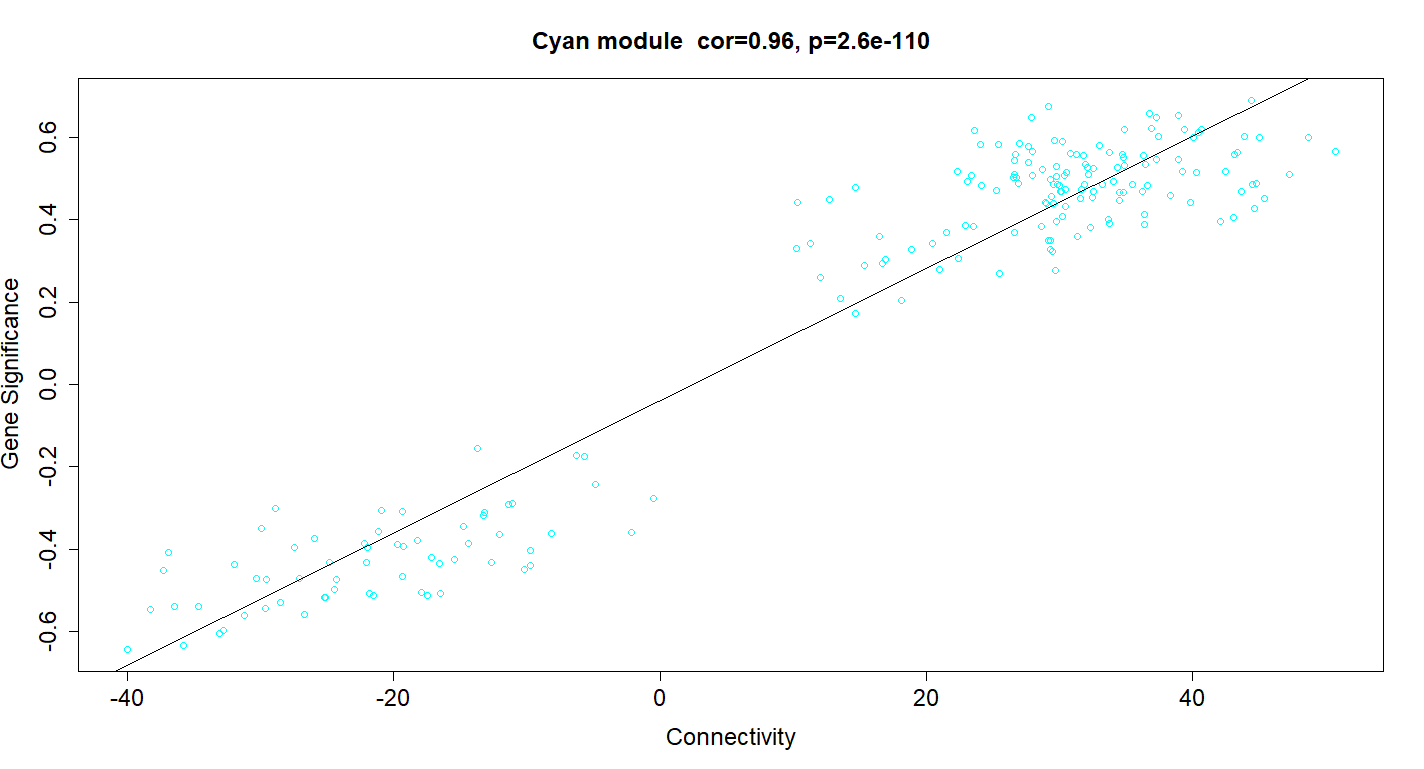


**1c**


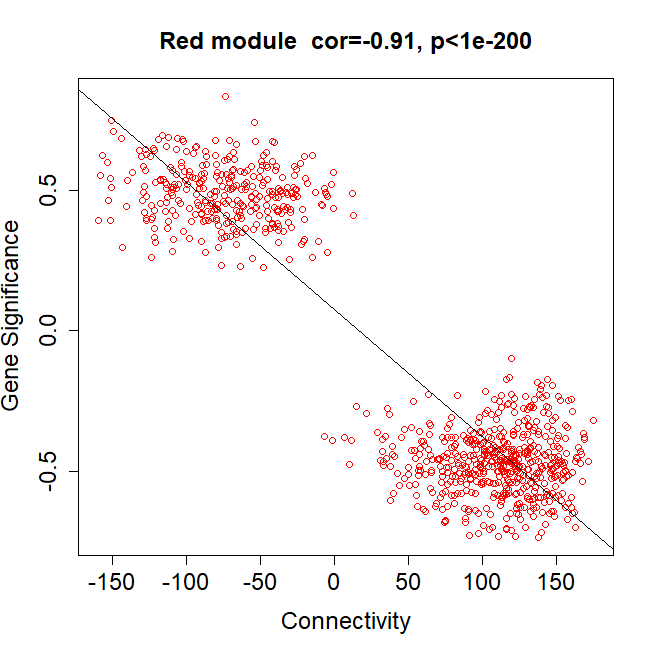


**Supplementary figure 1: Gene significance vs intramodular connectivity of three candidate modules.** Gene significance(y-axis) vs. intramodular connectivity (x-axis) plotted separately for blue module (Figure S1a), cyan module（Figure S1b）and red module (Figure S1c) in the simulated data set. For the blue module and cyan module, we observe that intramodular hub genes tend to have high gene significance. The opposite is true in red module.

**Supplementary figure 2: Functional annotation of three candidate modules**

2a：


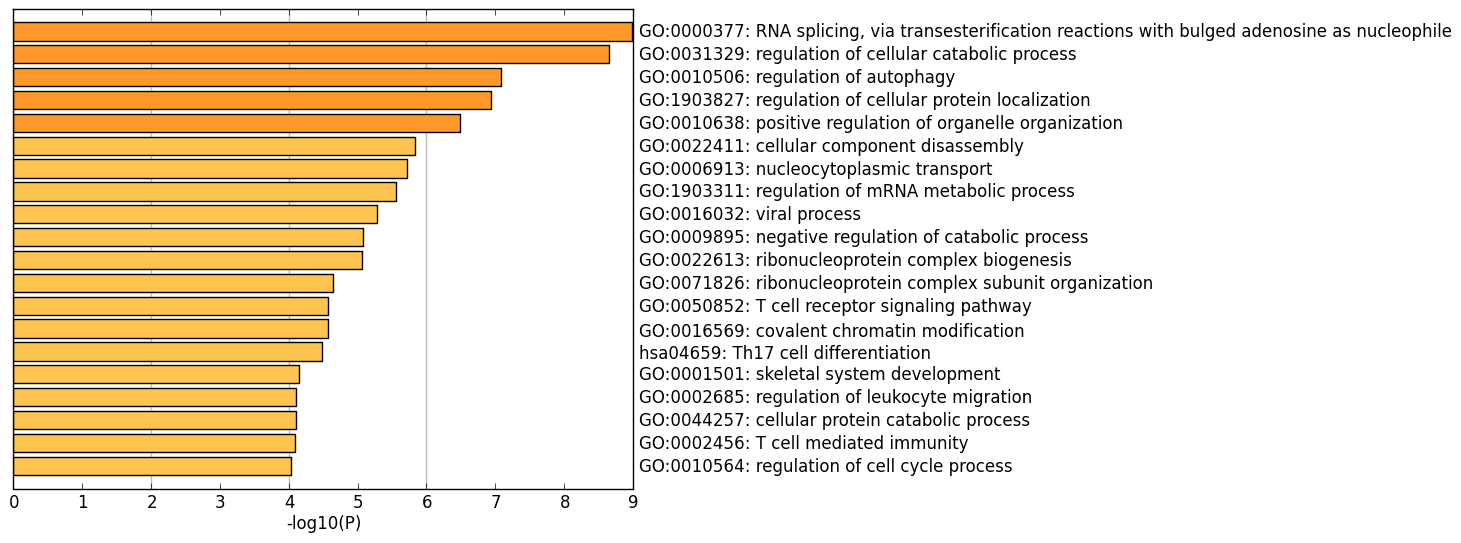


2b：


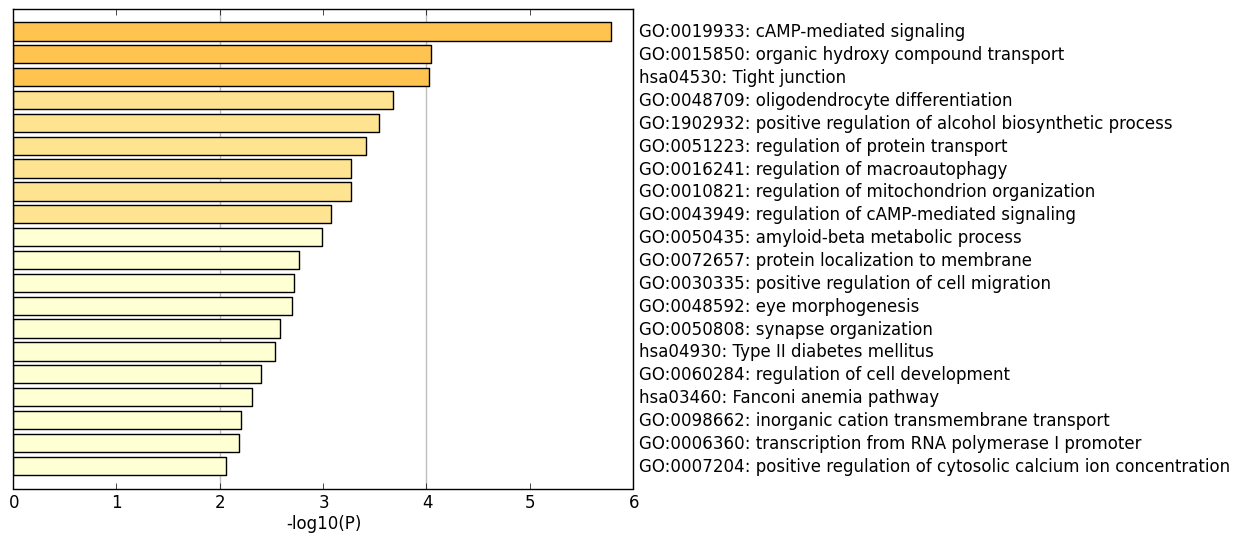


2c


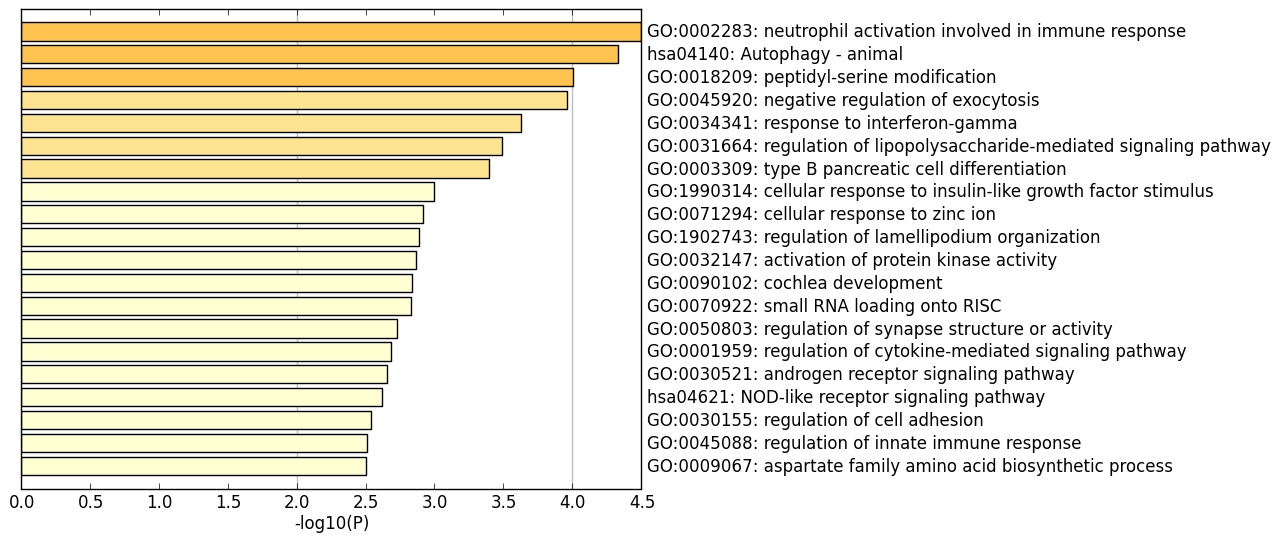


**Supplementary figure 2: Functional annotation of three candidate modules.** 2a：Heatmap of enriched terms across input gene lists of blue module, colored by p-values. 2b：Heatmap of enriched terms across input gene lists of cyan module, colored by p-values. 2c：Heatmap of enriched terms across input gene lists of red module, colored by p-values.

**Supplementary table1. The connectivity of top 50 genes in blue module**

| GeneSymbol | kWithin |
| --- | --- |
| NT5DC2 | 274.2454981 |
| SGSM2 | 267.2020449 |
| MYCBP | 264.5103685 |
| --- | 263.5745054 |
| U2AF1 | 262.8330753 |
| KIAA1109 | 261.9699883 |
| --- | 261.0173874 |
| ACVR1C | 260.1243942 |
| TEC | 260.0921633 |
| VTA1 | 259.7156792 |
| MCM3AP | 259.5161337 |
| KLHDC4 | 258.6167753 |
| SLC7A6 | 257.8075919 |
| FLJ44342 | 257.2708546 |
| PITPNM2 | 257.1628853 |
| EEF1A1 | 256.7900852 |
| SEC22C | 256.7531998 |
| CNOT2 | 256.6811872 |
| NBPF10 | 256.4223107 |
| CDH22 | 256.2001776 |
| FLJ31818 | 256.1466978 |
| LARS | 255.8353331 |
| ZRANB1 | 255.8236241 |
| --- | 255.4326143 |
| TAGAP | 255.2964402 |
| TTC3 | 255.0349505 |
| LRBA | 254.9807563 |
| CREBL2 | 254.8125545 |
| BMI1 | 254.7776395 |
| MRPS35 | 253.6745599 |
| ZNF765 | 253.6038761 |
| MAPRE1 | 253.4011279 |
| TMEM139 | 253.2429895 |
| NOL6 | 253.2198995 |
| --- | 253.1821535 |
| LOC284661 | 252.8605026 |
| ZNF143 | 252.8292547 |
| NLRP3 | 252.0620361 |
| POLR1B | 251.9568514 |
| . | 251.5166087 |
| PRMT8 | 251.4114147 |
| SMC6 | 250.7765176 |
| ARHGAP1 | 250.2259537 |
| DNAH1 | 250.102637 |
| RP5-1022P6.2 | 250.066603 |
| --- | 249.8363885 |
| SETX | 249.7879521 |
| CCNL1 | 249.7770288 |
| PPP2R3A | 249.72198 |
